# Supplementary material for: Monitoring training and recovery responses with heart rate measures during standardized warm-up in elite badminton players
Source: PubMed Central journal article supplement (PMC7751974; doi:10.1371/journal.pone.0244412), 2020-12-21

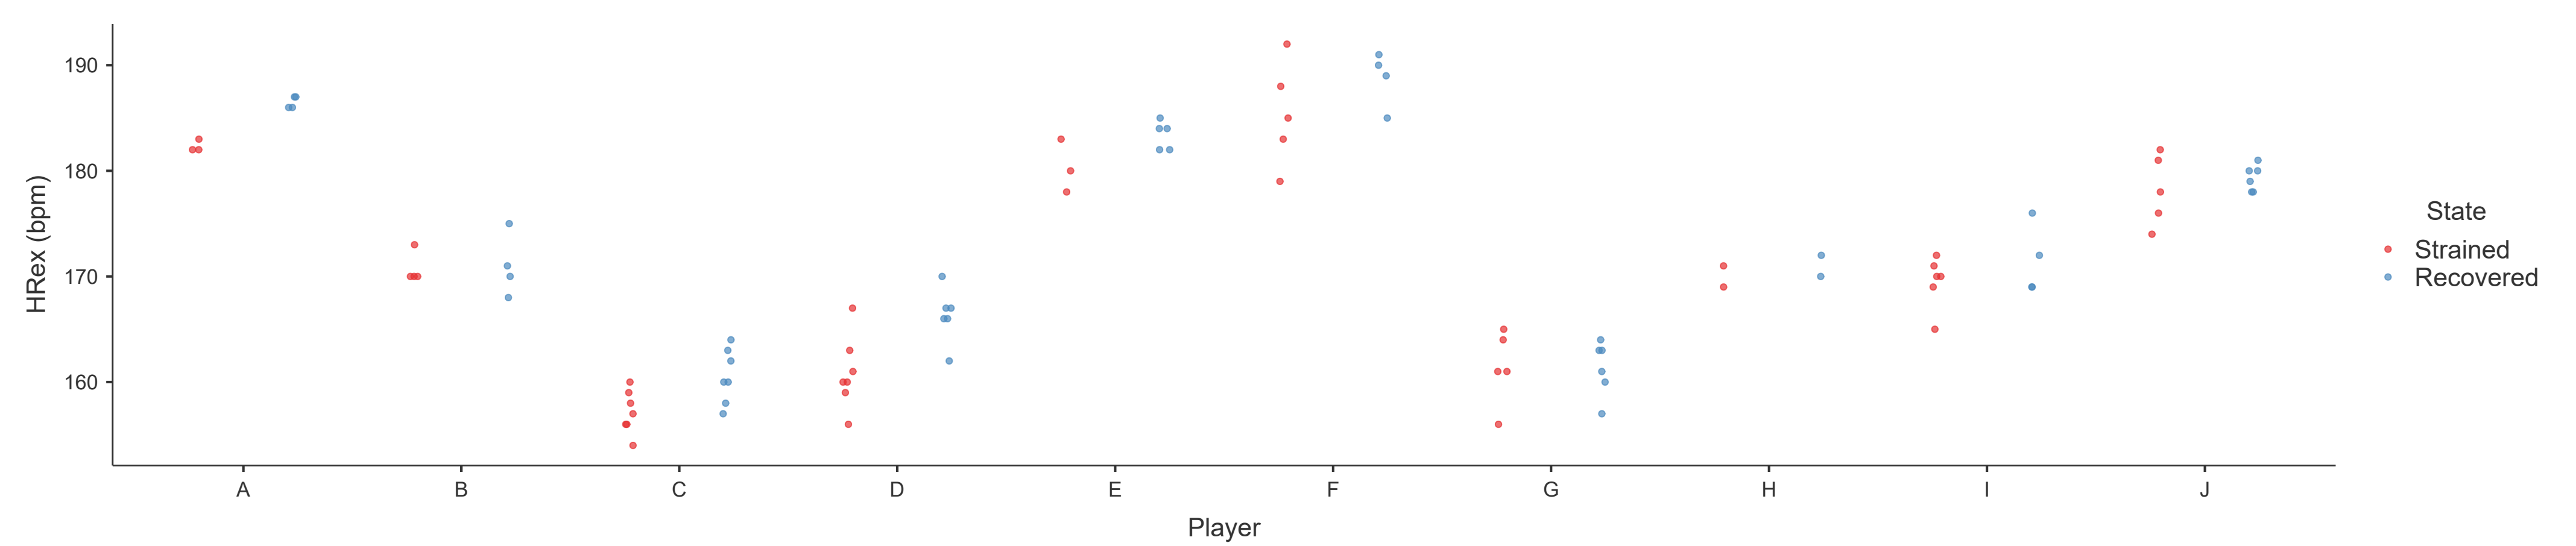

Supplement: pone.0244412.s003.pdf [file pone.0244412.s003.pdf]
