# Supplementary material for: Monitoring training and recovery responses with heart rate measures during standardized warm-up in elite badminton players
Source: PubMed Central journal article supplement (PMC7751974; doi:10.1371/journal.pone.0244412), 2020-12-21
Supplement: pone.0244412.s005.pdf [file pone.0244412.s005.pdf]

**S1 Table. Summary of individual monitoring data.**

Individual data are summarized for recovered and strained state. Group data summarizes mean individual data.

| Player State                                      | A          |            | B          |            | C          |            | D         |            | E        |           | F          |            | G         |           | H          |            | I          |             | J          |            | Overall     |            |
|---------------------------------------------------|------------|------------|------------|------------|------------|------------|-----------|------------|----------|-----------|------------|------------|-----------|-----------|------------|------------|------------|-------------|------------|------------|-------------|------------|
|                                                   | Rec        | Strain     | Rec        | Strain     | Rec        | Strain     | Rec       | Strain     | Rec      | Strain    | Rec        | Strain     | Rec       | Strain    | Rec        | Strain     | Rec        | Strain      | Rec        | Strain     | Rec         | Strain     |
| <b>Natural Logarithm of Creatine Kinase (U/L)</b> |            |            |            |            |            |            |           |            |          |           |            |            |           |           |            |            |            |             |            |            |             |            |
| <b>Tests</b>                                      | 5          | 5          | 4          | 6          | 7          | 7          | 6         | 7          | 4        | 5         | 4          | 5          | 5         | 5         | 5          | 3          | 5          | 7           | 7          | 7          | 52          | 57         |
| <b>Mean</b>                                       | 4.78       | 5.30       | 4.90       | 5.73       | 5.08       | 5.50       | 4.91      | 5.67       | 4.26     | 4.70      | 5.05       | 5.50       | 4.34      | 4.91      | 5.05       | 6.19       | 6.05       | 6.44        | 5.14       | 5.85       | 4.95        | 5.58       |
| <b>SD</b>                                         | 0.11       | 0.40       | 0.17       | 0.28       | 0.31       | 0.64       | 0.33      | 0.46       | 0.19     | 0.36      | 0.18       | 0.38       | 0.41      | 0.41      | 0.35       | 0.46       | 0.61       | 0.97        | 0.26       | 0.16       | 0.49        | 0.53       |
| <b>Diff.</b>                                      | 0.52       |            | 0.84       |            | 0.42       |            | 0.76      |            | 0.44     |           | 0.46       |            | 0.57      |           | 1.14       |            | 0.39       |             | 0.71       |            | 0.62 ± 0.24 |            |
| <b>d</b>                                          | 1.60       |            | 2.56       |            | 1.27       |            | 2.34      |            | 1.34     |           | 1.40       |            | 1.75      |           | 3.49       |            | 1.18       |             | 2.17       |            | 1.91 ± 0.73 |            |
| <b>Creatine Kinase (U/L)</b>                      |            |            |            |            |            |            |           |            |          |           |            |            |           |           |            |            |            |             |            |            |             |            |
| <b>Antilog</b>                                    | 119        | 201        | 134        | 309        | 161        | 244        | 135       | 290        | 71       | 109       | 155        | 245        | 77        | 136       | 156        | 487        | 425        | 625         | 170        | 347        | 142         | 265        |
| <b>SD<sub>antilog</sub></b>                       | [107, 133] | [134, 300] | [112, 159] | [234, 408] | [118, 218] | [129, 462] | [97, 188] | [183, 460] | [58, 86] | [76, 157] | [130, 185] | [168, 359] | [51, 115] | [91, 204] | [110, 220] | [308, 772] | [232, 779] | [237, 1646] | [131, 222] | [295, 407] | [87, 232]   | [156, 450] |
| <b>Diff<sub>antilog</sub></b>                     | 82         |            | 175        |            | 83         |            | 155       |            | 39       |           | 90         |            | 59        |           | 332        |            | 200        |             | 176        |            | 123         |            |
| <b>Natural Logarithm of Urea (mg/dL)</b>          |            |            |            |            |            |            |           |            |          |           |            |            |           |           |            |            |            |             |            |            |             |            |
| <b>Tests</b>                                      | 5          | 5          | 4          | 6          | 7          | 7          | 6         | 7          | 4        | 5         | 4          | 5          | 5         | 5         | 5          | 3          | 5          | 7           | 7          | 7          | 52          | 57         |
| <b>Mean</b>                                       | 2.92       | 3.11       | 3.25       | 3.26       | 3.33       | 3.40       | 3.35      | 3.59       | 3.73     | 3.66      | 3.03       | 3.28       | 3.17      | 3.13      | 3.28       | 3.31       | 3.72       | 3.63        | 3.38       | 3.50       | 3.32        | 3.39       |
| <b>SD</b>                                         | 0.13       | 0.26       | 0.09       | 0.13       | 0.10       | 0.17       | 0.12      | 0.11       | 0.04     | 0.11      | 0.33       | 0.13       | 0.11      | 0.23      | 0.11       | 0.28       | 0.09       | 0.19        | 0.14       | 0.15       | 0.26        | 0.20       |
| <b>Diff.</b>                                      | 0.19       |            | 0.01       |            | 0.07       |            | 0.24      |            | -0.07    |           | 0.25       |            | -0.03     |           | 0.03       |            | -0.09      |             | 0.13       |            | 0.07 ± 0.12 |            |
| <b>d</b>                                          | 1.38       |            | 0.04       |            | 0.52       |            | 1.73      |            | -0.52    |           | 1.79       |            | -0.22     |           | 0.20       |            | -0.64      |             | 0.92       |            | 0.52 ± 0.90 |            |
| <b>Urea (mg/dL)</b>                               |            |            |            |            |            |            |           |            |          |           |            |            |           |           |            |            |            |             |            |            |             |            |
| <b>Antilog</b>                                    | 19         | 22         | 26         | 26         | 28         | 30         | 29        | 36         | 42       | 39        | 21         | 27         | 24        | 23        | 26         | 27         | 41         | 38          | 29         | 33         | 28          | 30         |
| <b>SD<sub>antilog</sub></b>                       | [16, 21]   | [17, 29]   | [24, 28]   | [23, 30]   | [25, 31]   | [25, 36]   | [25, 32]  | [33, 40]   | [40, 43] | [35, 43]  | [15, 29]   | [23, 30]   | [21, 26]  | [18, 29]  | [24, 29]   | [21, 36]   | [37, 45]   | [31, 46]    | [25, 34]   | [29, 39]   | [21, 36]    | [24, 36]   |
| <b>Diff<sub>antilog</sub></b>                     | 4          |            | 0          |            | 2          |            | 8         |            | -3       |           | 6          |            | -1        |           | 1          |            | -3         |             | 4          |            | 2           |            |

S1 Table. Continued

| Player State                                                                   | A     |        | B     |        | C     |        | D     |        | E     |        | F     |        | G     |        | H     |        | I     |        | J     |        | Overall      |        |
|--------------------------------------------------------------------------------|-------|--------|-------|--------|-------|--------|-------|--------|-------|--------|-------|--------|-------|--------|-------|--------|-------|--------|-------|--------|--------------|--------|
|                                                                                | Rec   | Strain | Rec   | Strain | Rec   | Strain | Rec   | Strain | Rec   | Strain | Rec   | Strain | Rec   | Strain | Rec   | Strain | Rec   | Strain | Rec   | Strain | Rec          | Strain |
| <b>Short Recovery and Stress Scale - Physical Performance Capability (0-6)</b> |       |        |       |        |       |        |       |        |       |        |       |        |       |        |       |        |       |        |       |        |              |        |
| <b>Tests</b>                                                                   | 4     | 3      | 4     | 6      | 6     | 6      | 6     | 6      | 4     | 4      | 3     | 3      | 6     | 5      | 4     | 1      | 5     | 6      | 7     | 7      | 49           | 47     |
| <b>Mean</b>                                                                    | 3.5   | 3.3    | 3.5   | 3.0    | 4.3   | 3.3    | 3.7   | 3.3    | 3.5   | 3.0    | 4.0   | 3.3    | 3.7   | 2.6    | 4.0   | 3.0    | 3.6   | 3.3    | 4.0   | 3.1    | 3.8          | 3.1    |
| <b>SD</b>                                                                      | 0.6   | 0.6    | 0.6   | 0.0    | 0.8   | 0.5    | 0.8   | 0.5    | 0.6   | 0.8    | 0.0   | 1.2    | 0.8   | 0.5    | 0.8   |        | 0.9   | 0.8    | 0.0   | 0.4    | 0.3          | 0.2    |
| <b>Diff.</b>                                                                   | -0.2  |        | -0.5  |        | -1.0  |        | -0.3  |        | -0.5  |        | -0.7  |        | -1.1  |        | -1.0  |        | -0.3  |        | -0.9  |        | -0.6 ± 0.3   |        |
| <b>d</b>                                                                       | -0.24 |        | -0.73 |        | -1.46 |        | -0.49 |        | -0.73 |        | -0.98 |        | -1.56 |        | -1.46 |        | -0.39 |        | -1.25 |        | -0.93 ± 0.48 |        |
| <b>Short Recovery and Stress Scale - Overall Recovery (0-6)</b>                |       |        |       |        |       |        |       |        |       |        |       |        |       |        |       |        |       |        |       |        |              |        |
| <b>Tests</b>                                                                   | 4     | 3      | 4     | 6      | 6     | 6      | 6     | 6      | 4     | 4      | 3     | 3      | 6     | 5      | 4     | 1      | 5     | 6      | 7     | 7      | 49           | 47     |
| <b>Mean</b>                                                                    | 3.3   | 2.3    | 3.8   | 2.0    | 4.3   | 3.8    | 3.3   | 2.2    | 3.8   | 1.8    | 4.7   | 2.0    | 3.5   | 2.6    | 4.0   | 3.0    | 3.4   | 2.5    | 4.3   | 2.6    | 3.8          | 2.5    |
| <b>SD</b>                                                                      | 1.0   | 0.6    | 1.0   | 0.0    | 0.8   | 0.8    | 1.2   | 0.4    | 1.0   | 1.3    | 0.6   | 0.0    | 0.8   | 0.5    | 0.0   |        | 0.5   | 1.0    | 0.8   | 0.8    | 0.5          | 0.6    |
| <b>Diff.</b>                                                                   | -0.9  |        | -1.8  |        | -0.5  |        | -1.2  |        | -2.0  |        | -2.7  |        | -0.9  |        | -1.0  |        | -0.9  |        | -1.7  |        | -1.4 ± 0.7   |        |
| <b>d</b>                                                                       | -1.09 |        | -2.08 |        | -0.59 |        | -1.38 |        | -2.37 |        | -3.16 |        | -1.07 |        | -1.19 |        | -1.07 |        | -2.03 |        | -1.60 ± 0.78 |        |
| <b>Short Recovery and Stress Scale - Muscular Stress (0-6)</b>                 |       |        |       |        |       |        |       |        |       |        |       |        |       |        |       |        |       |        |       |        |              |        |
| <b>Tests</b>                                                                   | 4     | 3      | 4     | 6      | 6     | 6      | 6     | 5      | 4     | 4      | 3     | 3      | 6     | 5      | 4     | 1      | 5     | 5      | 7     | 7      | 49           | 45     |
| <b>Mean</b>                                                                    | 2.3   | 3.7    | 1.5   | 4.0    | 1.5   | 3.0    | 1.3   | 3.8    | 1.3   | 3.8    | 1.3   | 4.0    | 2.3   | 3.8    | 1.8   | 4.0    | 2.8   | 3.4    | 1.6   | 3.1    | 1.8          | 3.7    |
| <b>SD</b>                                                                      | 0.5   | 0.6    | 0.6   | 0.0    | 0.5   | 0.9    | 0.5   | 0.4    | 0.5   | 2.1    | 0.6   | 0.0    | 0.8   | 0.8    | 0.5   |        | 0.4   | 1.1    | 1.0   | 0.7    | 0.5          | 0.4    |
| <b>Diff.</b>                                                                   | 1.4   |        | 2.5   |        | 1.5   |        | 2.5   |        | 2.5   |        | 2.7   |        | 1.5   |        | 2.3   |        | 0.6   |        | 1.6   |        | 1.9 ± 0.7    |        |
| <b>d</b>                                                                       | 2.17  |        | 3.83  |        | 2.30  |        | 3.78  |        | 3.83  |        | 4.09  |        | 2.25  |        | 3.45  |        | 0.92  |        | 2.41  |        | 2.90 ± 1.04  |        |
| <b>Short Recovery and Stress Scale - Overall Stress (0-6)</b>                  |       |        |       |        |       |        |       |        |       |        |       |        |       |        |       |        |       |        |       |        |              |        |
| <b>Tests</b>                                                                   | 4     | 3      | 4     | 6      | 6     | 6      | 6     | 5      | 4     | 4      | 3     | 3      | 6     | 5      | 4     | 1      | 5     | 5      | 7     | 7      | 49           | 45     |
| <b>Mean</b>                                                                    | 3.0   | 3.7    | 2.5   | 3.5    | 1.5   | 2.8    | 1.8   | 3.6    | 1.5   | 3.3    | 2.0   | 4.3    | 2.7   | 3.6    | 2.0   | 4.0    | 2.4   | 3.6    | 1.6   | 3.4    | 2.1          | 3.6    |
| <b>SD</b>                                                                      | 1.2   | 1.2    | 1.0   | 0.5    | 0.8   | 1.0    | 0.8   | 0.9    | 0.6   | 0.5    | 0.0   | 0.6    | 1.0   | 0.5    | 0.0   |        | 0.5   | 1.1    | 0.5   | 0.5    | 0.5          | 0.4    |
| <b>Diff.</b>                                                                   | 0.7   |        | 1.0   |        | 1.3   |        | 1.8   |        | 1.8   |        | 2.3   |        | 0.9   |        | 2.0   |        | 1.2   |        | 1.9   |        | 1.5 ± 0.5    |        |
| <b>d</b>                                                                       | 0.88  |        | 1.31  |        | 1.75  |        | 2.32  |        | 2.30  |        | 3.07  |        | 1.23  |        | 2.63  |        | 1.58  |        | 2.44  |        | 1.95 ± 0.70  |        |

S1 Table. Continued

| Player State                               | A     |        | B     |        | C     |        | D     |        | E     |        | F     |        | G     |        | H     |        | I     |        | J     |        | Overall      |        |
|--------------------------------------------|-------|--------|-------|--------|-------|--------|-------|--------|-------|--------|-------|--------|-------|--------|-------|--------|-------|--------|-------|--------|--------------|--------|
|                                            | Rec   | Strain | Rec   | Strain | Rec   | Strain | Rec   | Strain | Rec   | Strain | Rec   | Strain | Rec   | Strain | Rec   | Strain | Rec   | Strain | Rec   | Strain | Rec          | Strain |
| <b>Countermovement Jump Height (cm)</b>    |       |        |       |        |       |        |       |        |       |        |       |        |       |        |       |        |       |        |       |        |              |        |
| <b>Tests</b>                               | 5     | 5      | 4     | 6      | 6     | 7      | 6     | 7      | 5     | 5      | 4     | 5      | 6     | 5      | 3     | 2      | 5     | 7      | 7     | 7      | 51           | 56     |
| <b>Mean</b>                                | 29.2  | 29.2   | 36.0  | 37.3   | 33.8  | 34.8   | 40.4  | 40.0   | 33.6  | 33.2   | 32.2  | 32.8   | 31.2  | 31.8   | 50.3  | 50.2   | 37.6  | 38.6   | 35.8  | 36.2   | 36.0         | 36.4   |
| <b>SD</b>                                  | 0.9   | 1.0    | 1.5   | 0.9    | 1.0   | 1.3    | 1.0   | 0.9    | 0.6   | 1.3    | 0.8   | 0.7    | 2.2   | 1.0    | 0.6   | 1.1    | 0.9   | 1.2    | 0.7   | 1.5    | 6.0          | 5.8    |
| <b>Diff.</b>                               | 0.0   |        | 1.3   |        | 1.0   |        | -0.4  |        | -0.4  |        | 0.6   |        | 0.6   |        | -0.2  |        | 1.0   |        | 0.4   |        | 0.4 ± 0.6    |        |
| <b>d</b>                                   | 0.00  |        | 1.14  |        | 0.87  |        | -0.36 |        | -0.36 |        | 0.54  |        | 0.54  |        | -0.16 |        | 0.83  |        | 0.32  |        | 0.34 ± 0.54  |        |
| <b>Jump Efficiency Coefficient (index)</b> |       |        |       |        |       |        |       |        |       |        |       |        |       |        |       |        |       |        |       |        |              |        |
| <b>Tests</b>                               | 5     | 5      | 4     | 6      | 6     | 7      | 6     | 7      | 5     | 5      | 4     | 5      | 6     | 5      | 3     | 1      | 5     | 5      | 7     | 7      | 51           | 53     |
| <b>Mean</b>                                | 1.13  | 1.14   | 1.49  | 1.65   | 1.18  | 1.23   | 1.64  | 1.73   | 1.30  | 1.27   | 1.10  | 1.29   | 1.47  | 1.50   | 1.80  | 1.78   | 1.73  | 1.69   | 1.26  | 1.32   | 1.41         | 1.46   |
| <b>SD</b>                                  | 0.17  | 0.17   | 0.09  | 0.19   | 0.23  | 0.21   | 0.31  | 0.17   | 0.11  | 0.14   | 0.33  | 0.18   | 0.22  | 0.31   | 0.13  |        | 0.20  | 0.06   | 0.05  | 0.11   | 0.25         | 0.24   |
| <b>Diff.</b>                               | 0.02  |        | 0.16  |        | 0.05  |        | 0.09  |        | -0.03 |        | 0.20  |        | 0.03  |        | -0.03 |        | -0.04 |        | 0.06  |        | 0.05 ± 0.08  |        |
| <b>d</b>                                   | 0.08  |        | 0.77  |        | 0.23  |        | 0.43  |        | -0.17 |        | 0.97  |        | 0.15  |        | -0.13 |        | -0.17 |        | 0.27  |        | 0.24 ± 0.39  |        |
| <b>Exercise Heart Rate (bpm)</b>           |       |        |       |        |       |        |       |        |       |        |       |        |       |        |       |        |       |        |       |        |              |        |
| <b>Tests</b>                               | 4     | 3      | 4     | 4      | 7     | 7      | 6     | 7      | 5     | 3      | 4     | 5      | 6     | 5      | 2     | 2      | 4     | 6      | 6     | 5      | 48           | 47     |
| <b>Mean</b>                                | 186.5 | 182.3  | 171.0 | 170.8  | 160.6 | 157.1  | 166.3 | 160.9  | 183.4 | 180.3  | 188.8 | 185.4  | 161.3 | 161.4  | 171.0 | 170.0  | 171.5 | 169.5  | 179.3 | 178.2  | 174.0        | 171.6  |
| <b>SD</b>                                  | 0.6   | 0.6    | 2.9   | 1.5    | 2.6   | 2.0    | 2.6   | 3.4    | 1.3   | 2.5    | 2.6   | 4.9    | 2.6   | 3.5    | 1.4   | 1.4    | 3.3   | 2.4    | 1.2   | 3.3    | 10.1         | 9.8    |
| <b>Diff.</b>                               | -4.2  |        | -0.2  |        | -3.5  |        | -5.4  |        | -3.1  |        | -3.4  |        | 0.1   |        | -1.0  |        | -2.0  |        | -1.1  |        | -2.4 ± 1.8   |        |
| <b>d</b>                                   | -1.81 |        | -0.09 |        | -1.51 |        | -2.33 |        | -1.34 |        | -1.47 |        | 0.04  |        | -0.43 |        | -0.86 |        | -0.48 |        | -1.03 ± 0.79 |        |
| <b>Rating of Perceived Exertion (6-20)</b> |       |        |       |        |       |        |       |        |       |        |       |        |       |        |       |        |       |        |       |        |              |        |
| <b>Tests</b>                               | 5     | 4      | 4     | 5      | 7     | 7      | 6     | 7      | 5     | 3      | 4     | 5      | 6     | 5      | 3     | 2      | 4     | 6      | 7     | 7      | 51           | 51     |
| <b>Mean</b>                                | 15.8  | 15.8   | 15.3  | 15.2   | 13.9  | 14.6   | 11.3  | 12.0   | 15.6  | 15.0   | 15.3  | 15.4   | 13.0  | 13.8   | 11.7  | 14.0   | 13.0  | 12.3   | 14.0  | 14.1   | 13.9         | 14.2   |
| <b>SD</b>                                  | 1.1   | 1.0    | 1.0   | 0.8    | 0.7   | 1.1    | 1.0   | 1.3    | 1.1   | 1.0    | 1.5   | 1.1    | 0.6   | 1.1    | 0.6   | 1.4    | 0.8   | 1.0    | 0.8   | 1.1    | 1.6          | 1.3    |
| <b>Diff.</b>                               | -0.1  |        | -0.1  |        | 0.7   |        | 0.7   |        | -0.6  |        | 0.2   |        | 0.8   |        | 2.3   |        | -0.7  |        | 0.1   |        | 0.3 ± 0.9    |        |
| <b>d</b>                                   | -0.05 |        | -0.05 |        | 0.75  |        | 0.71  |        | -0.64 |        | 0.16  |        | 0.85  |        | 2.47  |        | -0.71 |        | 0.15  |        | 0.36 ± 0.92  |        |

Rec: 'recovered' state; Strain: 'strained' state; SD: standard deviation; Diff.: mean difference between recovered and strained state; *d*: standardized mean difference = mean difference divided by pooled within-player SD, Antilog: back-transformed means of lnCK and lnUrea, Diff<sub>antilog</sub>: difference between back-transformed means lnCK and lnUrea, SD<sub>antilog</sub>: back-transformed values for mean – SD and mean + SD for lnCK or lnUrea [mean – SD, mean + SD].

Overall: means, mean differences and standardized mean differences are presented as grand means and between-player SDs for all 10 players.
